# Supplementary material for: Conventional and molecular cytogenetics of human non-medullary thyroid carcinoma: characterization of eight cell line models and review of the literature on clinical samples
Source: PubMed Central journal article supplement (PMC2651892; doi:10.1186/1471-2407-8-371), 2008-12-16

a)

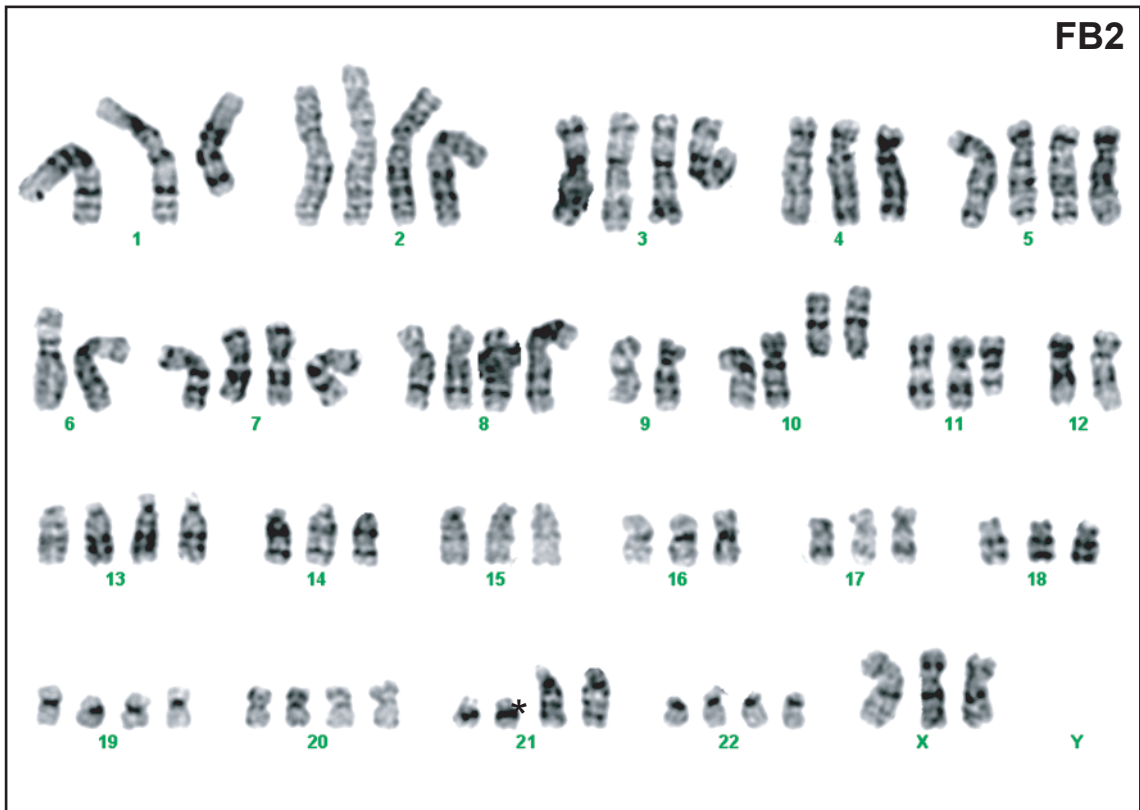

b)

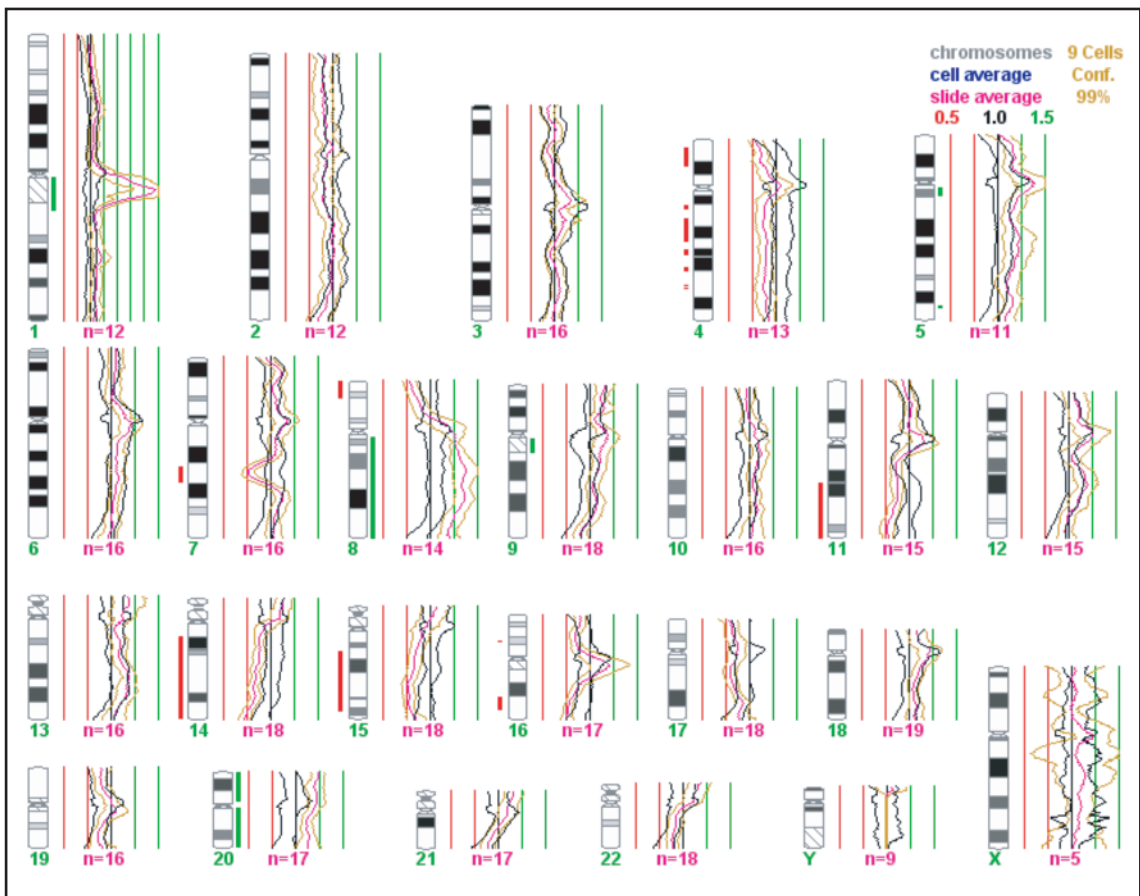

Supplement: 1471-2407-8-371-S2.pdf [file 1471-2407-8-371-S2.pdf]
