# Supplementary material for: Conventional and molecular cytogenetics of human non-medullary thyroid carcinoma: characterization of eight cell line models and review of the literature on clinical samples
Source: PubMed Central journal article supplement (PMC2651892; doi:10.1186/1471-2407-8-371), 2008-12-16
Supplement: 1471-2407-8-371-S10.pdf [file 1471-2407-8-371-S10.pdf]

Supp Table 1 - Genetic findings in TPC-1 and FB2 cell lines

| Cell line | Karyotype                                                                                                                                                                                                                                                                                                                                                                                                                         | CGH                                                                                                                                                       |
|-----------|-----------------------------------------------------------------------------------------------------------------------------------------------------------------------------------------------------------------------------------------------------------------------------------------------------------------------------------------------------------------------------------------------------------------------------------|-----------------------------------------------------------------------------------------------------------------------------------------------------------|
| TPC-1     | 49,XX, <b>der(1)t(1;10;21)(1pter→1q31::21q21→21qter)</b> ,<br>+der(1)t(1;3)(p13;p21),der(3)t(3;9)(p11;q22), <b>del(7)(q22q31)</b> ,<br><b>+i(8)(q10)</b> , <b>der(10)t(1;10;21)(10q11.2→10pter::1q31→1qter)</b> ,<br>+der(10)inv(10)(q11.2q21)t(3;10)(q25;p11), <b>der(21)t(1;10;21)</b><br><b>(21pter→21q21::10q21.2→10q11.2::10q21.2→10qter)</b> [25]                                                                           | rev ish enh(1)(q),dim(3)(p12p21),enh(3)(q24q29),<br><b>dim(7)(q21q31)</b> , <b>amp(8)(q)</b> ,enh(9)(q22q34),enh(10)(q)                                   |
| FB2       | 82~87,XXXX, <b>der(1)t(1;10;21)(1pter→1q31::21q21→21qter)</b> x2,<br><b>-4,del(7)(q22q31)</b> x2, <b>i(8)(q10)</b> , <b>der(10)t(1;10;21)(10pter-</b><br><b>&gt;10p15::10q11.2→10p15::1q31→1qter)</b> x2,-11,-14,-15,-16,-17,<br>+20, <b>der(21)t(1;10;21)(21pter→21q21::10q21.2→</b><br><b>10q11.2::10q21.2→10qter)</b> x2[20]/82~87, idem,<br>der(6)t(1;6)(p32;q15)[5]/82~87, idem,der(11)t(11;17)(q14;q24),<br>add(12)(q24)[6] | rev ish dim(4), <b>dim(7)(q22q31)</b> ,dim(8)(p21p23), <b>enh(8)(q)</b> ,<br>dim(11)(q14q25),dim(14)(q),dim(15)(q),dim(16)(p11p13),<br>dim(16)(q),enh(20) |

Karyotype and CGH descriptions follow the ISCN 2005 guidelines. Shared chromosomal aberrations are depicted in bold.
